# Supplementary material for: Developing a Cell Culture Protocol to Induce Quiescence in Intestinal Fibroblasts Using Design of Experiments Statistical Optimization
Source: Research Square preprint supplement (doi:10.21203/rs.3.rs-7677632/v1), 2025-10-29
Supplement: Supplementary file 1 [file c323d034cbf877cb6ec18039.xlsx]

## Sheet: Sheet1
	Factor 1	Factor 2	Factor 3	Factor 4	Factor 5	Response 1	Response 2	Response 3	Response 4
Run	Collagen I coating	Collagen III coating	Laminin coating	Vitamin D	FGF	α-SMA intensity	Fibronectin Secretion	Proliferation	Viability
	μg/cm²	μg/cm²	μg/cm²	μM	ng/mL	intensity per cell (normalized to control)	ng/mL/cell	%	%
1	2	30	16	5.5	10.5	0.417392	1.05603	21.0101	93.5004
2	16	2	16	10	10.5	0.215968	4.88596	13.5014	85.3664
3	16	16	16	10	1	0.324917	3.63768	1.00849	83.9194
4	16	16	2	5.5	1	0.350075	1.95652	7.33198	98.5532
5	16	16	16	5.5	10.5	0.318206	0.620465	22.1184	98.8723
6	30	2	16	5.5	10.5	0.373707	1.28397	14.2933	98.3145
7	16	30	16	5.5	1	0.277928	2.54193	11.0833	96.0169
8	16	30	16	5.5	20	0.323294	3.00817	11.927	96.9128
9	30	16	30	5.5	10.5	0.396816	1.03333	15.807	97.7871
10	16	16	2	10	10.5	0.31151	2.65509	5.30113	87.7606
11	30	16	2	5.5	10.5	0.352203	1.72997	17.0912	98.4854
12	16	16	2	5.5	20	0.226612	1.2527	21.7991	98.9421
13	2	16	16	5.5	1	1.81468	0.912979	9.09274	96.6439
14	16	16	16	1	1	0.562689	0.743641	7.38051	98.3209
15	16	2	16	1	10.5	0.488689	1.3172	6.55251	98.9124
16	16	16	16	1	20	0.241336	1.45899	25.2653	98.5619
17	30	16	16	5.5	20	0.373909	0.78719	23.8296	98.4574
18	30	16	16	10	10.5	0.441142	3.76548	2.1644	82.9755
19	16	30	16	1	10.5	0.188772	2.429	17.1953	98.9165
20	16	30	16	10	10.5	0.35151	3.85517	3.29035	84.0789
21	30	16	16	1	10.5	0.373097	0.868563	22.8118	99.3374
22	16	2	16	5.5	20	0.207346	1.41191	21.8538	98.1998
23	16	2	16	5.5	1	0.371424	1.51974	11.7541	98.0649
24	2	16	30	5.5	10.5	0.40479	1.17861	18.4722	92.6332
25	2	16	16	10	10.5	0.515676	2.21788	3.01421	78.4948
26	2	16	2	5.5	10.5	0.353645	0.592396	18.5973	95.6945
27	16	2	30	5.5	10.5	0.234458	0.511213	22.3334	98.5787
28	16	16	16	10	20	0.221747	1.79156	3.3036	91.952
29	16	16	30	10	10.5	0.217747	2.47844	3.01331	88.8763
30	16	16	16	5.5	10.5	0.442675	1.88899	13.771	97.441
31	16	30	30	5.5	10.5	0.355602	1.65702	16.938	97.656
32	16	16	30	5.5	1	0.246128	2.04354	9.66457	98.2991
33	30	30	16	5.5	10.5	0.388288	0.642514	17.8968	97.9956
34	16	16	30	5.5	20	0.16387	1.84561	20.4144	98.1733
35	30	16	16	5.5	1	0.535926	1.54657	9.70925	97.2461
36	16	16	2	1	10.5	0.32104	0.754053	19.267	98.8829
37	2	16	16	1	10.5	0.3978	0.698163	23.4141	98.215
38	2	16	16	5.5	20	0.324278	0.826238	22.0397	94.3611
39	2	2	16	5.5	10.5	0.352083	1.07788	19.4628	95.835
40	16	30	2	5.5	10.5	0.203333	1.2621	19.2114	97.6713
41	16	2	2	5.5	10.5	0.304765	0.825098	25.8659	95.7894
42	16	16	30	1	10.5	0.216019	1.68654	21.2796	98.612
