# Supplementary material for: Developing a Cell Culture Protocol to Induce Quiescence in Intestinal Fibroblasts Using Design of Experiments Statistical Optimization
Source: Research Square preprint supplement (doi:10.21203/rs.3.rs-7677632/v1), 2025-10-29
Supplement: Supplementary file 2 [file e147a67b29c79d98ed1ba133.docx]

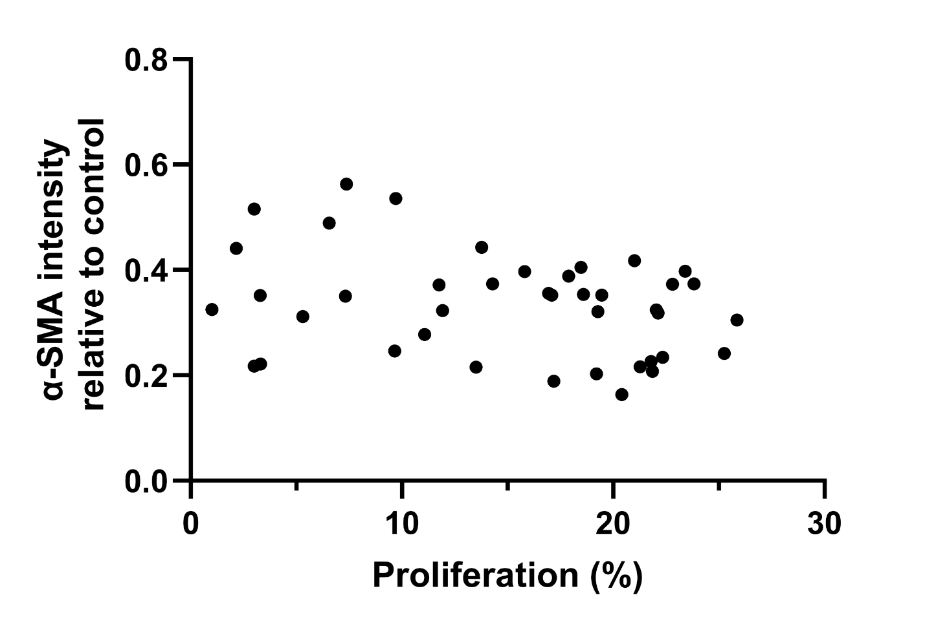


**Figure S1. Relationship between α-SMA intensity and proliferation.** Each data point represents the average α-SMA intensity per cell (relative to control) and average proliferation (%) from matched measurements of all 42 conditions tested to during DOE optimization. n = 5 per condition.


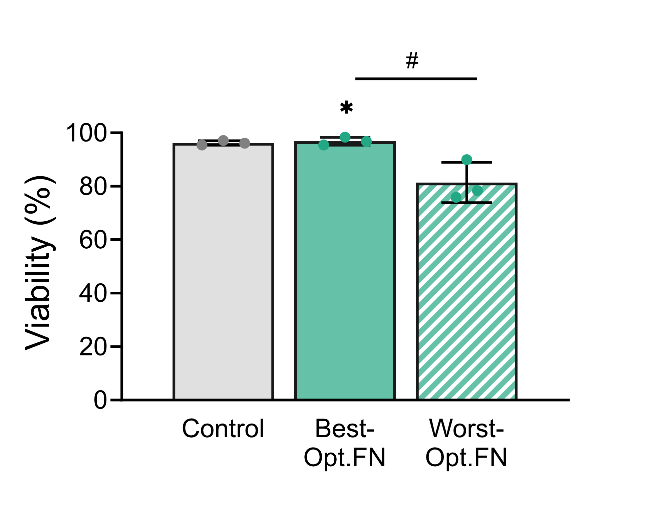
**Figure S2.** **Colonic fibroblasts exhibited reduced viability under the worst-case predictions when optimizing for fibronectin (FN) secretion.** Viability was quantified across three groups: control (untreated), best-case, and worst-case predictions from single-objective optimization targeting FN secretion. During this optimization, all other response variables were held at the “none-in” state—meaning they were not targeted or prioritized in the optimization process—to assess the isolated impact of FN secretion. *p<0.05 compared to control; #p<0.05 for comparison shown.


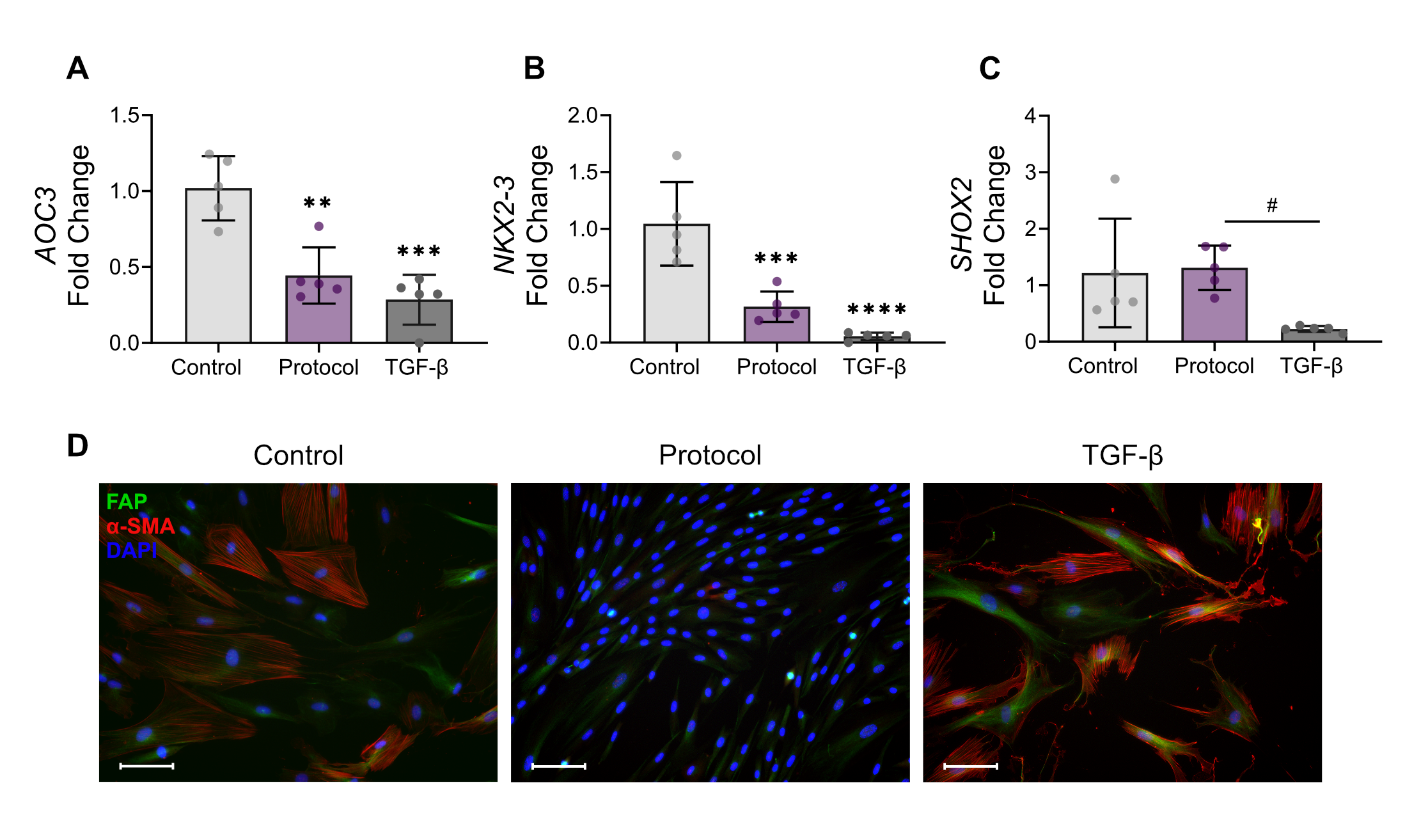


**Figure S3. Assessment of myofibroblastic expression in cells cultured using the optimized protocol. (A-B)** Quantification of gene expression of **(A)** AOC3, **(B)** NKX2-3 and **(C)** SHOX2 via qRT-PCR. **(D)** Immunofluorescence staining of the fibroblast activation markers, fibroblast activation protein - FAP (green) and α-SMA (red) after 5-day treatment. Nuclei are counterstained with DAPI (blue). Scale bar indicates 100μm.N = 5 replicates per condition was used. ** p<0.005, *** p<0.0001 and **** p<0.0001 compared to the control and # p<0.05 compared to TGF-β1.
